# Supplementary material for: Isolation Procedure for CP E. coli from Caeca Samples under Review towards an Increased Sensitivity
Source: MDPI journal article supplement (doi:10.3390/microorganisms9051105), 2021-05-20
Supplement: s1 [file s1]

Supplemental Material Table 1: Detailed information about the used CPE. The seven CPE used for pre-studies are highlighted in grey.

Ampicillin (AMP); Azithromycin (AZI); Cefepime (FEP); Chloramphenicol (CHL); Ciprofloxacin (CIP); Colistin (COL); Ertapenem (ERP); Cefotaxime (FOT); Cefoxitin (FOX); Gentamicin (GEN); Imipenem (IMI); Kanamycin (KAN); Meropenem (MERO); Nalidixic acid (NAL); Sulfamethoxazole (SMX); Ceftazidime (TAZ); Tetracycline (TET); Tigecycline (TGC); Trimethoprim (TMP).

| Isolate no.         | Carbapenemase | AMP | AZI | CEF  | CHL  | CIP    | COL | ERP  | FOT | FOX | GEN  | IMI | MERO | NAL  | SMX   | TAZ  | TET | TGC   | TMP   |
|---------------------|---------------|-----|-----|------|------|--------|-----|------|-----|-----|------|-----|------|------|-------|------|-----|-------|-------|
| CP_1                | GES-5         | >64 | 4   | 0.25 | ≤8   | 0.03   | ≤1  | 0.25 | 64  | 32  | 2    | 0.5 | 0.12 | ≤4   | >1024 | 8    | 64  | ≤0.25 | >2    |
| CP_2                | KPC-2         | >64 | 8   | 32   | >128 | >8     | ≤1  | >2   | >64 | >64 | >32  | 4   | 8    | >128 | ≤8    | 32   | >64 | ≤0.25 | ≤0.25 |
| CP_3                | GES-5         | >64 | 4   | 0.5  | ≤8   | ≤0.015 | ≤1  | 0.25 | 2   | 64  | 2    | 0.5 | 0.25 | ≤4   | >1024 | 8    | 64  | ≤0.25 | >32   |
| CP_4                | KPC-2         | >64 | >64 | 8    | 16   | >8     | ≤1  | >2   | >16 | 16  | 32   | 4   | 4    | >128 | >1024 | 16   | >64 | ≤0.25 | 32    |
| CP_5                | NDM-1         | >64 | 16  | >32  | >128 | >8     | ≤1  | >2   | >64 | >64 | >32  | >16 | >16  | >128 | >1024 | >128 | >64 | ≤0.25 | >32   |
| CP_6                | OXA-48        | >64 | 4   | 0.5  | ≤8   | 0.03   | ≤1  | 2    | 1   | 8   | ≤0.5 | 1   | 1    | ≤4   | ≤8    | ≤0.5 | ≤2  | ≤0.25 | ≤0.25 |
| CP_7                | OXA-48        | >64 | 8   | 1    | 16   | 0.12   | ≤1  | >2   | 4   | 16  | ≤0.5 | 2   | 2    | ≤4   | >1024 | 8    | 4   | ≤0.25 | 1     |
| CP_8                | VIM-1         | >64 | 64  | >32  | >128 | 0.5    | ≤1  | 2    | >64 | >64 | 2    | 4   | 4    | 16   | >1024 | >128 | ≤2  | 0.5   | >32   |
| CP_9                | VIM-1         | >64 | 8   | 16   | >128 | ≤0.015 | ≤1  | 0.5  | 32  | 32  | 2    | 4   | 2    | ≤4   | >1024 | 128  | 64  | 0.5   | ≤0.25 |
| CP_10               | VIM-1         | >64 | 8   | 4    | 128  | ≤0.015 | ≤1  | 0.12 | 32  | 16  | 1    | 2   | 0.25 | ≤4   | >1024 | >8   | ≤2  | ≤0.25 | 32    |
| CP_11               | VIM-1         | >64 | 8   | 16   | 128  | ≤0.015 | ≤1  | 0.12 | >64 | 32  | 1    | 4   | 1    | ≤4   | 16    | 64   | 4   | 0.5   | >32   |
| CP_12               | VIM-1         | >64 | 16  | 16   | >8   | ≤1     | >2  | >32  | >64 | >64 | 32   | 8   | 8    | >128 | >1024 | >8   | 4   | ≤0.25 | >32   |
| <i>E. coli</i>      | VIM-1         | >64 | 8   | 16   | 64   | 0.03   | ≤1  | 0.12 | >64 | 32  | 1    | 4   | 1    | ≤4   | 32    | 64   | 4   | 0.5   | >32   |
| <i>S. Corvallis</i> | NDM-1         | >64 | 64  | 16   | >128 | 0.5    | 4   | >2   | >64 | >64 | 1    | 4   | 8    | 32   | >1024 | >64  | 64  | 0.5   | ≤0.25 |
| <i>S. Infantis</i>  | VIM-1         | >64 | 8   | >32  | >128 | ≤0.015 | ≤1  | 1    | >64 | 64  | 1    | 4   | 4    | ≤4   | >1024 | >128 | ≤2  | 0.5   | >32   |
| <i>S. Infantis</i>  | VIM-1         | >64 | 8   | >32  | >128 | ≤0.015 | ≤1  | 0.5  | >64 | >64 | 1    | 4   | 4    | ≤4   | >1024 | >128 | ≤2  | 0.5   | >32   |

Supplemental Material Table 2: The repeated isolation of CPE from the spiked faecal samples. Method A is the EURL-method. Method B is the modified method. For calculation, the OXA and CARBA- site of the chromID® SMART CARBA agars and of the McC+CTX+MEM and the McC+MEM plates of the *in-house* agar were combined. „+“ described the confirmed positive samples and “-“ the confirmed negative samples..

| Sample no. | Week 1         |                                       |                                  |                                  |                                       | Week 2         |                                       |                                  |                                  |                                       | Week 3         |                                       |                                  |                                  |                                       |
|------------|----------------|---------------------------------------|----------------------------------|----------------------------------|---------------------------------------|----------------|---------------------------------------|----------------------------------|----------------------------------|---------------------------------------|----------------|---------------------------------------|----------------------------------|----------------------------------|---------------------------------------|
|            | Spiked isolate | Method A + chromID® SMART CARBA agars | Method A + <i>in-house</i> agars | Method B + <i>in-house</i> agars | Method B + chromID® SMART CARBA agars | Spiked isolate | Method A + chromID® SMART CARBA agars | Method A + <i>in-house</i> agars | Method B + <i>in-house</i> agars | Method B + chromID® SMART CARBA agars | Spiked isolate | Method A + chromID® SMART CARBA agars | Method A + <i>in-house</i> agars | Method B + <i>in-house</i> agars | Method B + chromID® SMART CARBA agars |
| 1          | CP_1           | -                                     | +                                | +                                | -                                     | ATCC25922      | -                                     | -                                | -                                | -                                     | ATCC25922      | -                                     | -                                | -                                | -                                     |
| 2          | CP_2           | +                                     | +                                | +                                | +                                     | CP_1           | -                                     | +                                | -                                | -                                     | CP_1           | +                                     | +                                | -                                | -                                     |
| 3          | CP_3           | +                                     | +                                | -                                | -                                     | CP_2           | +                                     | +                                | +                                | +                                     | CP_2           | +                                     | +                                | +                                | +                                     |
| 4          | CP_4           | +                                     | +                                | +                                | +                                     | CP_3           | +                                     | +                                | .                                | -                                     | CP_3           | +                                     | +                                | -                                | -                                     |
| 5          | ATCC25922      | -                                     | -                                | -                                | -                                     | ATCC25922      | -                                     | -                                | -                                | -                                     | ATCC25922      | -                                     | -                                | -                                | -                                     |
| 6          | ATCC25922      | -                                     | -                                | -                                | -                                     | CP_4           | +                                     | +                                | +                                | +                                     | CP_4           | +                                     | +                                | +                                | +                                     |
| 7          | CP_5           | +                                     | +                                | +                                | +                                     | CP_5           | +                                     | +                                | +                                | +                                     | CP_5           | +                                     | +                                | +                                | +                                     |
| 8          | CP_6           | +                                     | +                                | +                                | +                                     | ATCC25922      | -                                     | -                                | -                                | -                                     | ATCC25922      | -                                     | -                                | -                                | -                                     |
| 9          | CP_7           | +                                     | +                                | +                                | +                                     | ATCC25922      | -                                     | -                                | -                                | -                                     | ATCC25922      | -                                     | -                                | -                                | -                                     |
| 10         | CP_8           | +                                     | +                                | +                                | +                                     | ATCC25922      | -                                     | -                                | -                                | -                                     | ATCC25922      | -                                     | -                                | -                                | -                                     |
| 11         | ATCC25922      | -                                     | -                                | -                                | -                                     | CP_7           | +                                     | +                                | +                                | +                                     | CP_7           | +                                     | +                                | +                                | +                                     |
| 12         | CP_9           | +                                     | +                                | +                                | +                                     | CP_8           | +                                     | +                                | +                                | +                                     | CP_8           | +                                     | +                                | +                                | +                                     |
| 13         | ATCC25922      | -                                     | -                                | -                                | -                                     | CP_9           | +                                     | +                                | +                                | +                                     | CP_9           | +                                     | +                                | +                                | +                                     |
| 14         | ATCC25922      | -                                     | -                                | -                                | -                                     | CP_10          | -                                     | +                                | +                                | +                                     | CP_10          | +                                     | +                                | +                                | +                                     |
| 15         | CP_10          | -                                     | +                                | +                                | -                                     | CP_11          | -                                     | +                                | +                                | -                                     | CP_11          | -                                     | +                                | +                                | -                                     |
| 16         | CP_11          | -                                     | +                                | +                                | -                                     | ATCC25922      | -                                     | -                                | -                                | -                                     | ATCC25922      | -                                     | -                                | -                                | -                                     |
| 17         | CP_12          | +                                     | +                                | +                                | +                                     | CP_12          | -                                     | +                                | +                                | -                                     | CP_12          | -                                     | +                                | +                                | -                                     |
| 18         | ATCC25922      | -                                     | -                                | -                                | -                                     | CP_13          | +                                     | +                                | +                                | +                                     | CP_13          | +                                     | +                                | +                                | +                                     |

Supplemental Material Table 3: Summarized real-time PCR results on the repeated detection of carbapenemase genes from the spiked faecal samples.

1  
2

| Sample no. | Week 1         |        |        |        |                      | Week 2         |     |        |        |                      | Week 3         |     |        |        |                      |
|------------|----------------|--------|--------|--------|----------------------|----------------|-----|--------|--------|----------------------|----------------|-----|--------|--------|----------------------|
|            | Carba-penemase | BPW    | LB+CTX | LB+MEM | Both LB-enrichements | Carba-penemase | BPW | LB+CTX | LB+MEM | Both LB-enrichements | Carba-penemase | BPW | LB+CTX | LB+MEM | Both LB-enrichements |
| 1          | GES            | +      | -      | -      | -                    | ATCC25922      | -   | -      | -      | -                    | ATCC25922      | -   | -      | -      | -                    |
| 2          | KPC            | +      | +      | +      | +                    | GES            | +   | +      | -      | +                    | GES            | +   | +      | -      | +                    |
| 3          | GES            | +      | +      | -      | +                    | KPC            | +   | +      | +      | +                    | KPC            | +   | +      | +      | +                    |
| 4          | KPC            | -      | +      | -      | +                    | GES            | +   | +      | +      | +                    | GES            | +   | +      | +      | +                    |
| 5          | ATCC25922      | -      | -      | -      | -                    | ATCC25922      | -   | -      | -      | -                    | ATCC25922      | -   | -      | -      | -                    |
| 6          | ATCC25922      | +(GES) | -      | -      | -                    | KPC            | -   | +      | +      | +                    | KPC            | -   | +      | +      | +                    |
| 7          | NDM            | +      | +      | +      | +                    | NDM            | +   | -      | +      | +                    | NDM            | +   | +      | +      | +                    |
| 8          | OXA            | +      | -      | +      | +                    | ATCC25922      | -   | -      | -      | -                    | ATCC25922      | -   | -      | -      | -                    |
| 9          | OXA            | +      | +      | +      | +                    | ATCC25922      | -   | -      | -      | -                    | ATCC25922      | -   | -      | -      | -                    |
| 10         | VIM            | -      | +      | -      | +                    | ATCC25922      | -   | -      | -      | -                    | ATCC25922      | -   | +      | -      | +                    |
| 11         | ATCC25922      | -      | -      | -      | -                    | OXA            | +   | -      | +      | +                    | OXA            | +   | -      | +      | +                    |
| 12         | VIM            | -      | +      | -      | +                    | OXA            | +   | +      | +      | +                    | OXA            | +   | +      | +      | +                    |
| 13         | ATCC25922      | -      | -      | -      | -                    | VIM            | +   | +      | +      | +                    | VIM            | +   | +      | +      | +                    |
| 14         | ATCC25922      | -      | -      | -      | -                    | VIM            | -   | +      | -      | +                    | VIM            | -   | +      | -      | +                    |
| 15         | VIM            | -      | +      | -      | +                    | VIM            | -   | +      | -      | +                    | VIM            | -   | +      | -      | +                    |
| 16         | VIM            | -      | -      | -      | -                    | ATCC25922      | -   | -      | -      | -                    | ATCC25922      | -   | -      | -      | -                    |
| 17         | VIM            | +      | +      | +      | +                    | VIM            | -   | +      | -      | +                    | VIM            | -   | +      | -      | +                    |
| 18         | ATCC25922      | -      | -      | -      | -                    | VIM            | -   | +      | +      | +                    | VIM            | +   | +      | +      | +                    |

3  
4
